# Supplementary material for: Comprehensive analysis of the ability of the Cuproptosis- related gene signature to predict the prognosis of patients with pediatric acute myeloid leukemia
Source: Research Square preprint supplement (doi:10.21203/rs.3.rs-4280593/v1), 2024-04-29
Supplement: Supplementary file 1 [file 31c5a0844ee555bd2ec94ee3.xlsx]

## Sheet: index
table 1	Cuproptosis-related genes list
table 2	TARGET clinical Table
table 3	GSE192638 clinical Table
table 4	Copy number variation result in TCGA and TARGET cohort
table 5	TARGET CRGs Unicox results
table 6	Cuproptosis-related signature modle data
table 7	Risk result group data
table 8	Cox-analysis data
table 9	Clinical data characters and risk genes expression
table 10	Primers used in this study

## Sheet: S1 Cuproptosis-related genes
gene
OXA1L
CDKN2A
TMEM191B
SOX2
AHR
TKT
LIPT1
DLAT
PDHB
LIAS
MBTPS1
MBTPS2
SCAP
FDX1
RPAP1
RPL3
UBAP2L
PDHA1
LDLR
CAPRIN1
ZFAT
IDH2
SAMM50
PITRM1
PGP
DLD
PRKDC
CERT1
TSC22D2
INTS6
TADA2A
MTF1
API5
C6orf136
GLS
CNN1
SLC16A1
ABCE1
MPC1
CLUH
MCUR1
AFG3L2
FZD8
MAU2
HAUS5
CEPT1
PCBP2
CIAO2A
REXO2
BRPF1
CCDC137
TPK1
EGLN1
RAD9A
COQ7
CHTOP
C1QBP
TRIM32
PRDM10
SLFN11
CENPJ
YEATS2
PFKP
TANK
RPUSD3
MRPL17
SGF29
COX11
NDUFS1
MRPL21
LARS2
MRPL41
POLG
MECR
QRSL1
MTG1
STARD7
FASTKD5
PDE12
TWNK
MRPL15
CLPP
MRPS25
CS
COX17
PDHX
CYCS
AASDHPPT
FAU
HARS2
SLC25A39
CDK1
LIPT2
GCLM
DNM1L
RPS27A
WARS2
MRPL36
C7orf26
MRPS33
RPL19
GFM1
NDUFA6
GCLC
SDHAF2
COX18
COX14
COA5
PTCD3
MRPS11
GATB
COX15
MRPL51
DHX15
ATL2
MFF
YARS2
UQCC2
NDUFA9
PPA2
NDUFB6
ELOB
MRPS7
SLC25A19
MRPS16
COX6B1
TARS2
COA6
EARS2
COPS5
CIAO1
RB1
GATC
GTPBP4
SARS2
NARS2
PARS2
UQCRC1
PRC1
NAPA
METTL17
TUBGCP4
MRPL53
CMPK1
FPGS
MARS2
NDUFAF6
MRM2
MRPS9
CENPW
ATPAF2
UBA2
MTO1
GPX4
PDZD4
CHCHD1
HSD17B10
RPL27
RRN3
TFAM
RPS25
MRPS14
IDH3A
UBE2I
RMND1
SHMT2
MRPL34
SLC25A51
HCCS
H2AC6
TRRAP
MRPS23
UQCR10
CSTF3
MRPL13
NDUFB10
TIMM9
MRRF
RPAIN
NDUFA8
CLPX
CYC1
RCC1L
COPZ1
MTERF1
IMP4
TUT1
COX7B
SSBP1
FARS2
NDUFS6
DBR1
MRPL2
MRPS30
RPUSD4
POT1
NDUFB9
POLR2K
SUPT16H
MRPS12
MRPS18A
GGPS1
SPATA5
NDUFB7
ATIC
N6AMT1
DDX20
DYNLRB1
RPLP0
MRPS2
WDR12
RUVBL2
CHMP4B
MRPL52
RSL1D1
SLC25A26
MRPL57
GNL3
COQ2
NDUFS2
TAF6L
ARMH3
PMVK
ALAS1
EXOC3
SLC25A32
MRPL12
MAN2C1
MRPS18B
DTYMK
NDUFV1
CDC16
KLF5
MRPL44
SRP54
ACD
PTPMT1
DARS1
NDUFB4
YAE1
DPH1
RPS19
GCSH
ATP5PD
CDC27
COX7C
ANKRD49
DYNC1LI2
TRAPPC11
MAD2L2
PET117
CCDC28B
MRPL16
MFN2
MRPL40
MCAT
COX4I1
MARCHF5
STK11
GADD45GIP1
NDUFB5
COPB2
NFYC
VPS45
MRPL30
MCMBP
GBF1
PSMD6
ZKSCAN5
NDUFA11
BUD31
KAT8
GTPBP6
NDUFA1
UQCRC2
HNRNPA2B1
NUBPL
EIF4G1
RPL28
PSMA6
DNTTIP2
TRAIP
NUP133
TOP1MT
IFT81
MCM5
PSMB5
KMT2A
PURG
HMBS
MRPS21
OSBPL9
NOP2
NRF1
CIT
VARS2
UQCC1
SNAPIN
GSS
MRPL14
CERS2
ZBTB11
USE1
SPDYE1
TAF4
HNRNPU
SLC7A5
RPL10A
NDUFS3
EPC2
MRPS22
POLR2B
GTF2B
ZNF365
PPIE
XRN1
MRPS18C
BRCA1
MTIF3
EIF3I
PHF5A
ACTR10
DOT1L
SURF6
U2SURP
LONP1
FOXM1
TEFM
ARHGEF39
UTP25
MDH2
MTBP
RPL7A
MRPL55
MRPS5
SYMPK
ENTPD3
NSF
ATP7B
PCGF6
FAM111A
TEDC1
ZNF341
PET100
NDUFB11
KIDINS220
DNAJC11

## Sheet: S2 TARGET Clinical Table
	TARGET CLINICAL BASELINE INFORMATION
			HIGH RISK(108)	LOW RISK(79)	p	Missing
	Gender (%)	FEMALE	58 ( 53.7)	38 ( 48.1)	0.543	0
		MALE	50 ( 46.3)	41 ( 51.9)
	Race (%)	INDIAN OR ALASKA	1 ( 1.0)	1 ( 1.3)	0.316	4.3
		ASIAN	3 ( 2.9)	0 ( 0.0)
		AFRICAN	11 ( 10.7)	10 ( 13.2)
		HAWAIIAN	3 ( 2.9)	0 ( 0.0)
		OTHER	4 ( 3.9)	1 ( 1.3)
		WHITE	81 ( 78.6)	64 ( 84.2)
	Age (%)	<12	70 ( 64.8)	49 ( 62.0)	0.812	0
		>=12	38 ( 35.2)	30 ( 38.0)
	Event (%)	CENSORED	18 ( 16.7)	24 ( 30.4)	0.031	0
		DEATH	0 ( 0.0)	1 ( 1.3)
		INDUCTION FAILURE	4 ( 3.7)	0 ( 0.0)
		RELAPSE	86 ( 79.6)	54 ( 68.4)
	Fab.category (%)	M0	4 ( 3.9)	0 ( 0.0)	0.08	4.8
		M1	12 ( 11.7)	9 ( 12.0)
		M2	26 ( 25.2)	19 ( 25.3)
		M4	26 ( 25.2)	26 ( 34.7)
		M5	19 ( 18.4)	16 ( 21.3)
		M6	3 ( 2.9)	0 ( 0.0)
		M7	8 ( 7.8)	0 ( 0.0)
		NOS	5 ( 4.9)	5 ( 6.7)
	FLT3/ITD.mutation (%)	No	97 ( 89.8)	73 ( 92.4)	0.725	0
		Yes	11 ( 10.2)	6 ( 7.6)
	FLT3/ITD.AR (%)	High	7 ( 63.6)	4 ( 66.7)	1	90.9
		Low	4 ( 36.4)	2 ( 33.3)
	CEBPA.mutation (%)	No	101 ( 95.3)	75 ( 94.9)	1	1.1
		Yes	5 ( 4.7)	4 ( 5.1)
	WT1.mutation (%)	No	95 ( 91.3)	73 ( 94.8)	0.549	3.2
		Yes	9 ( 8.7)	4 ( 5.2)
	Risk.group (%)	High	8 ( 8.1)	4 ( 5.1)	0.017	5.3
		Low	31 ( 31.3)	41 ( 52.6)
		Standard	60 ( 60.6)	33 ( 42.3)
	risk (%)	HIGH RISK	108 (100.0)	0 ( 0.0)	<0.001	0
		LOW RISK	0 ( 0.0)	79 (100.0)
	WBC.group (%)	High	91 ( 84.3)	72 ( 91.1)	0.243	0
		Low	17 ( 15.7)	7 ( 8.9)
	BM.group (%)	High	59 ( 56.7)	48 ( 61.5)	0.617	2.7
		low	45 ( 43.3)	30 ( 38.5)
	PB.group (%)	High	78 ( 72.2)	68 ( 86.1)	0.037	0
		low	30 ( 27.8)	11 ( 13.9)

## Sheet: S3 GSE192638 Clinical-table
No.	Patient code	Ethnicity	Diagnosis	De novo	MDS-related changes	Gender	Age at Dx (y)	Dx WBC (x109/L)	Karyotype	Normal karyotype	Complex karyotype	Monosomy 7	RUNX1-RUNX1T1	CBFB-MYH11	KMT2A-rearranged	Cytogenetic risk group	FLT3	NPM1	CEBPA	Treatment protocol	BMT	CR	Death	Event	Event type	Duration to event/ censor (months)
1	LEU26	Chinese	AML	Y	N	F	16	35.7	46,XX,t(9;11)(p22;q23)[14]/46,idem,i(17)(q10)[6]	N	N	N	N	N	Y	Intermediate	N	N	N	NOPHO AML 2004	Y	Y	Y	Y	Relapse	33.3
2	LEU31	Chinese	AML	Y	N	M	1.1	56.8	54,XY,+2,+6,+7,+8,+10,+13,+19,+19[9]/46,XY[11]	N	Y	N	N	N	N	Adverse	N	N	N	NOPHO AML 2004	N	Y	N	N		36
3	LEU34	Chinese	AML	Y	N	F	16.6	44.2	46,XX,t(8;21)(q22;q22)[19]/46,XX[2]	N	N	N	Y	N	N	Favorable	N	N	N	AML96	N	Y	N	N		36
4	LEU54	Chinese	MDS	N	Y	F	5.6	8.6	46,XX,t(3;5)(q25;q34)[14]/46,idem,i(17)(q10)(6)/46,XX[2]	N	N	N	N	N	N	Intermediate	N	N	N	NIL	Y	Y	N	N		36
5	LEU55	Chinese	AML	Y	N	F	4.7	238	46,XX,-7,+mar[10]/46,XX[10]	N	N	Y	N	N	N	Adverse	N	N	N	NOPHO AML 2004	Y	Y	N	N		36
6	LEU57	Chinese	AML	Y	N	F	1.9	42.7	47,XX,+21[21]	N	N	N	N	N	N	Favorable	N	N	N	AML DS 2006	N	Y	N	N		36
7	LEU58	Chinese	AML	Y	N	M	10.9	263.1	46,XY[20]	Y	N	N	N	N	N	Intermediate	Y	N	Y	NOPHO AML 2004	Y	Y	Y	Y	Relapse	4.1
8	LEU66	Chinese	AML	Y	N	F	13.6	1.9	46,XX,t(11;19)(q23;q13.1)[16]/47,idem,+21[4]	N	N	N	N	N	Y	Intermediate	N	N	Y	NOPHO AML 2004	N	Y	Y	Y	Death	1.2
9	LEU76	Chinese	AML	Y	N	M	8.8	3.3	45,X,-Y,t(8;21)(q22;q22)[4]/45,idem,del(9)(q21q22)[6]/46,idem,+4,del(9)(q21q22)[5]/46,XY[2]	N	N	N	Y	N	N	Favorable	N	N	N	NOPHO AML 2004	N	N	Y	Y	Death	0.6
10	LEU81	Chinese	AML	Y	N	M	4.4	3.6	46,XY,t(8;21)(q22;q22)[4]/46,idem,del(7)(q22q32)[9]/46,XY[4]	N	N	N	Y	N	N	Favorable	N	N	N	NOPHO AML 2004	N	Y	N	N		36
11	LEU89	Chinese	AML	Y	N	M	16.3	164.2	46,X,-Y,-13,+marx2[18]	N	Y	N	N	N	N	Adverse	N	N	N	NOPHO AML 2004	N	Y	Y	Y	Relapse	6.9
12	LEU100	Chinese	AML	Y	N	M	6.5	19.6	46,XY,t(8;12;21)(q22;q15;q22),del(9)(q13q32)[5]/47,idem,+del(9)(q13q32),add(11)(p13)[16]/46,XY[5]	N	N	N	Y	N	N	Favorable	N	Y	N	NOPHO AML 2004	Y	Y	N	Y	Relapse	25.4
13	LEU110	Chinese	AML	Y	N	F	16.6	10.4	46,XX[21]	Y	N	N	N	N	N	Intermediate	N	N	N	NOPHO DBH AML 2012	Y	Y	Y	Y	Relapse	14.2
14	LEU120	Chinese	AML	Y	N	F	4.3	19.8	46,XX,t(10;12;11)(p12;p13;q23)[18]/46,XX[4]	N	N	N	N	N	Y	Adverse	Y	N	N	NOPHO DBH AML 2012	Y	Y	Y	Y	Relapse	6
15	LEU145	Asian	AML	Y	N	M	14.8	28.3	46,XY[20]	Y	N	N	N	N	N	Intermediate	N	N	Y	NOPHO DBH AML 2012	Y	Y	Y	Y	Relapse	17
16	LEU152	Chinese	AML	Y	N	M	7.8	26.8	46,XY,del(9)(q13q22)[6]/46,XY,del(9)(q13)[4]/46,XY[14]	N	N	N	N	N	N	Intermediate	Y	N	N	NOPHO DBH AML 2012	Y	Y	N	N		36
17	LEU153	Chinese	AML	Y	N	F	4.7	32.6	45,X,-X,t(8;21)(q22;q22)[11]/46,XX[9]	N	N	N	Y	N	N	Favorable	N	N	N	NOPHO DBH AML 2012	Y	Y	Y	Y	Relapse	16.3
18	LEU156	Chinese	AML	Y	N	F	1.3	40.2	46,XX,inv(16)(p13.1q22)[17]/46,XX[5]	N	N	N	N	Y	N	Favorable	N	N	N	AML96	N	Y	N	N		36
19	LEU167	Chinese	MPAL	Y	N	M	17.8	5.7	46,XY,del(1)(p36.1),add(2)(q33),del(6)(q21q23),-10,del(11)(q21q23),add(14)(q32),+mar[8]/46,XY[12]	N	Y	N	N	N	N	Adverse	N	N	Y	ALL CCLG 2008	N	Y	Y	Y	Relapse	6
20	LEU183	Chinese	AML	N	N	M	14.6	4.3	79~83<4n,XXYY,+X[2],-Y[3],add(1)(p36.1)x2[9],-2[9],add(2)(p11.2)[9],-3[3],-4[9],-4[6],-7[9],-7[9],-8[5],-9[9],-9[9],-12[8],-13[8],-14[3],-15[4],-16[9],-16[7],-19[7],+22[2],+1~4mar[9][cp9]/46,XY[11]	N	Y	N	N	N	N	Adverse	N	N	N	FLA	Y	Y	N	Y	Relapse	15.1
21	LEU200	Chinese	AML	Y	N	M	18	135.8	46,XY,t(1;21)(q25;q22)[13]/46,XY[7]	N	N	N	N	N	N	Intermediate	N	N	N	NOPHO DBH AML 2012	Y	Y	N	N		36
22	LEU212	Chinese	MPAL	Y	N	M	0.1	68.3	46,XY,der(1)t(1;19;11)(p36.1;p13;q23),der(11)t(1;19;11),der(19)add(19)(p13)t(1;19;11)[19]/46,XY[2]	N	Y	N	N	N	Y	Adverse	Y	N	N	Interfant ALL 06	N	Y	Y	Y	Relapse	4.5
23	LEU216	Chinese	AML	Y	N	M	9.9	13.1	45,X,-Y,t(8;21)(q22;q22)[1]/45,idem,del(9)(q13q22)[12]/46,XY[8]	N	N	N	Y	N	N	Favorable	N	N	N	NOPHO DBH AML 2012	N	Y	N	N		36
24	LEU254	Chinese	AML	Y	Y	M	7.6	4.1	47,XY,+8[14]/46,XY[6]	N	N	N	N	N	N	Intermediate	N	N	N	NOPHO DBH AML 2012	Y	Y	N	Y	Relapse	15.6
25	LEU257	Chinese	AML	Y	N	M	11.9	6.8	45,X,-Y,t(8;21)(q22;q22.1)[17]/45,idem,?del(14)(q32)[3]	N	N	N	Y	N	N	Favorable	N	N	N	NOPHO DBH AML 2012	N	Y	N	N		34.6
26	LEU262	Chinese	AML	Y	Y	F	3.2	19.7	46,XX,t(16;21)(p13.1;q22),del(19)(p13.1)[3]/46,XX,t(16;21)(p13.1;q22),t(19;22)(p13.1;q13)[3]/46,XX,der(2)t(1;2)(q25;q37),t(16;21)(p13.1;q22),del(19)(p13.1)[8]/46,XX,der(2)t(1;2)(q25;q37),t(16;21)(p13.1;q22),t919;22)(p13.1;q13)[5]	N	Y	N	N	N	N	Adverse	N	N	N	NOPHO DBH AML 2012	Y	Y	Y	Y	Death	8.7
27	LEU271	Chinese	AML	Y	N	M	1.1	12.2	47,XY,der(9)t(1;9)(q21;q34),+i(21)(q10)[18]/46,XY[2],ish 11q23(KMT2Ax2)[40],nucish(KMT2Ax2)[100]	N	N	N	N	N	N	Intermediate	Y	N	N	NOPHO DBH AML 2012	N	N	Y	Y	Death	1.8
28	LEU280	Chinese	AML	Y	N	F	1.1	65	45,XX,-1,-7,-9,+der(?)(t?;1)(?;p13),+der(?)(t?;1)(?;q25)[12]/44~45,idem,+mar[cp2]/46,XX[2]	N	Y	Y	N	N	N	Adverse	N	N	N	NOPHO DBH AML 2012	N	N	Y	Y	Death	8.8
29	LEU293	Chinese	AML	Y	Y	F	1.6	32	46,XX,del(3)(q13),t(3;10;12)(p13;q22;p13),der(18)?t(8;18)(q22;p11.3)[1]/46,idem,del(1)(q21q41),add(13)(q12)[2]/50,idem,+6,+19,+21,+21[16]	N	Y	N	N	N	N	Adverse	N	N	N	NOPHO DBH AML 2012	N	Y	Y	Y	Relapse	3.6
30	LEU306	Chinese	AML	Y	N	M	10.2	218.6	46,XY,inv(16)(13.1q22)[20]	N	N	N	N	Y	N	Favorable	N	N	N	NOPHO DBH AML 2012	Y	Y	N	N		28.7
31	LEU319	Chinese	AML	Y	N	M	10.3	93.5	46,XY,t(8;21)(q22;q22),del(9)(q13q22)[16]	N	N	N	Y	N	N	Favorable	N	N	N	NOPHO DBH AML 2012	Y	Y	N	N		27.5
32	LEU322	Chinese	AML	N	N	M	8.4	10.1	46,XY[20]	Y	N	N	N	N	N	Intermediate	N	N	N	Palliative care	N	N	Y	Y	Death	2.8
33	LEU331	Chinese	AML	Y	N	F	11.3	14.5	45,X,-X,t(8;21)(q22;q22)[11]	N	N	N	Y	N	N	Favorable	N	N	N	NOPHO DBH AML 2012	N	Y	N	N		25.7
34	LEU339	Chinese	AML	Y	Y	M	9.1	69.5	46,XY,t(1;2)(p36.3;q22),16qh[18]/46,XY,16qh[1]	N	N	N	N	N	N	Intermediate	N	N	N	NOPHO DBH AML 2012	Y	Y	N	Y	Relapse	20.7
35	LEU350	Chinese	AML	Y	N	F	16.2	81.3	50,XX,+8,+der(9)t(9:11)(p22:q23),t(9:11),+14,+19[18]	N	N	N	N	N	Y	Intermediate	Y	N	N	NOPHO DBH AML 2012	Y	Y	N	N		23.9
36	LEU351	Asian	AML	Y	N	F	10.7	1.6	46,XX[20]	Y	N	N	N	N	N	Intermediate	N	N	N	NOPHO DBH AML 2012	Y	Y	N	Y	Relapse	15.1
37	LEU352	Chinese	AML	Y	N	M	1.2	35	46,XY,t(9;11)(p22;q23)[17]/46,XY[2]	N	N	N	N	N	Y	Intermediate	N	N	N	NOPHO DBH AML 2012	N	Y	N	N		23.4
38	LEU360	Chinese	AML	Y	N	M	13.6	4.5	46,XY[22]	Y	N	N	N	N	N	Intermediate	Y	N	N	NOPHO DBH AML 2012	Y	Y	N	N		22.6
39	LEU404	Chinese	AML	Y	N	M	2.4	119.2	46,XY,t(10;11)(p12:q23)[17]/46,XY[2]	N	N	N	N	N	Y	Adverse	N	N	N	NOPHO DBH AML 2012	N	Y	N	N		16.6
40	LEU414	Chinese	MDS	Y	Y	M	8.9	13.3	47,XY,+8[7]/48,idem,+19[17]/47,idem,t(4;12)(q27;p13)[5]	N	Y	N	N	N	N	Adverse	N	N	N	NIL	Y	Y	Y	Y	Death	5.1
41	LEU417	Chinese	AML	Y	Y	F	18	2.5	46,XX,t(10;12)(q22;q24.1)[2]/46,XX[20]	N	N	N	N	N	N	Intermediate	Y	N	N	NOPHO DBH AML 2012	Y	Y	N	N		15.2
42	LEU421	Chinese	AML	Y	N	F	17.7	119.7	46,XX[20]	Y	N	N	N	N	N	Intermediate	N	Y	N	NOPHO DBH AML 2012	N	Y	N	N		14.8
43	LEU433	Chinese	AML	Y	Y	M	4.8	3.6	47,XY,+8[4]/46,XY[16]	N	N	N	N	N	N	Intermediate	N	N	N	NOPHO DBH AML 2012	N	Y	N	N		12.8
44	LEU451	Chinese	MPAL	N	N	F	1.2	148.7	46,XX,t(4;11)(q21;q23)[3]/48,idem,+X,+1,-13,i(17)(q10,der(20)t(13;20)(q12;q13.3),+21[5]/46,XX[1]	N	N	N	N	N	Y	Adverse	N	N	N	Targeted therapy	Y	Y	N	Y	Relapse	7.7
45	LEU458	Chinese	AML	Y	N	M	10.1	108.9	46,XY[20]	Y	N	N	N	N	N	Intermediate	N	N	N	NOPHO DBH AML 2012	N	Y	N	N		10.8
46	LEU463	Chinese	AML	Y	Y	M	16.3	34.6	44~48,XY,add(3)(p21)[6],add(3)(q12)[4],-5[5],add(5)(p15)[2],add(5)(q13)[7],add(6)(q13)[8],-7[11],add(9)(p13)[9],-14[3],-17[9],+1~6mar[cp13]/45,XY,add(3)(p21),add(5)(q13),add(6)(q13),-7,add(9)(p13),-17,+mar[5]/46,XY[1]	N	Y	Y	N	N	N	Adverse	N	N	N	NOPHO DBH AML 2012	Y	Y	Y	Y	Relapse	4.3
47	LEU470	Chinese	AML	Y	N	M	0.7	18.9	47,XY,+1,add(1)(p13),t(9:11)(p22;q23),add(11)(q23)[10]/47,idem,del(13)(q12q14)[8]	N	N	N	N	N	Y	Intermediate	N	N	N	NOPHO DBH AML 2012	N	Y	N	N		9.3
48	LEU485	Chinese	AML	Y	N	F	9.8	2.5	46,XX,t(16;21)(p11,2;q22)[14]/92<4n>,XXXX,add(9)(q22)x2,t(16;21)(p11,2;q22)x2[4]	N	Y	N	N	N	N	Adverse	N	N	N	NOPHO DBH AML 2012	Y	Y	N	N		7.1
49	LEU501	Chinese	AML	Y	N	F	1.4	18.6	48,XX,+8,+13,-18,-22,+2mar[9]/46,XX[11]	N	Y	N	N	N	N	Adverse	N	N	N	NOPHO DBH AML 2012	N	Y	Y	Y	Relapse	9.4
50	LEU519	Chinese	AML	Y	N	M	12.6	51.2	45,X,-Y,t(8;21)(q22;q22)[17]/46,XY[2]	N	N	N	Y	N	N	Favorable	N	N	N	NOPHO DBH AML 2012	N	Y	N	N		5.1
51	LEU535	Chinese	AML	Y	N	M	8.3	14.6	46,XY,t(8;21)(q22;q22)[17]/46,XY[1]	N	N	N	Y	N	N	Favorable	N	N	N	NOPHO DBH AML 2012	N	Y	N	N		3.7
52	LEU544	Chinese	AML	Y	N	M	14.5	52.3	46,XY,t(9;11)(p22;q23)[20]/46,XY[1]	N	N	N	N	N	Y	Intermediate	Y	N	N	NOPHO DBH AML 2012	N	Y	N	N		3.2
Abbreviations: ALL, acute lymphoblastic leukemia; AML, acute myeloid leukemia; MDS, myelodysplastic syndrome; MPAL, mixed phenotype acute leukemia; MPNST, malignant peripheral nerve sheath tumor; Dx, diagnosis; WBC, white blood cell; FLT3, fms-like tyrosine kinase receptor-3; NPM1, nucleophosmin; CEBPA, CCAAT enhancer binding protein alpha; BMT,
bone marrow transplantation; CR, complete remission.

## Sheet: S4 Copy number variation result
Copy number varition
		TARGET		TCGA
	Row.names	GAIN.x	LOSS.x	GAIN.y	LOSS.y
1	AASDHPPT	3.26087	1.08696	9.47368	0
2	ABCE1	4.34783	1.08696	6.84211	0
3	ACD	3.26087	4.34783	4.21053	2.10526
4	ACTR10	3.26087	0	5.26316	0
5	AFG3L2	5.43478	0	3.68421	3.15789
6	AHR	2.17391	0	2.10526	6.31579
7	ALAS1	4.34783	0	4.21053	1.57895
8	ANKRD49	3.26087	0	8.94737	0
9	API5	3.26087	0	6.84211	0.526316
10	ARHGEF39	3.26087	0	5.26316	0
11	ARMH3	4.34783	0	6.31579	0
12	ATIC	3.26087	1.08696	5.26316	0
13	ATL2	3.26087	1.08696	5.78947	0
14	ATP5PD	7.6087	0	6.84211	1.57895
15	ATP7B	2.17391	2.17391	6.31579	0
16	ATPAF2	3.26087	2.17391	4.21053	5.26316
17	BRCA1	4.34783	0	6.84211	1.57895
18	BRPF1	4.34783	0	4.73684	0.526316
19	BUD31	3.26087	0	2.63158	7.36842
20	C1QBP	2.17391	1.08696	3.68421	5.26316
21	C6orf136	6.52174	0	5.26316	0
22	C7orf26	2.17391	0	2.63158	6.31579
23	CAPRIN1	3.26087	0	7.36842	0.526316
24	CCDC137	7.6087	1.08696	6.84211	1.05263
25	CCDC28B	3.26087	0	6.84211	0
26	CDC16	7.6087	1.08696	8.42105	1.05263
27	CDC27	6.52174	0	6.31579	1.05263
28	CDK1	3.26087	0	6.31579	0
29	CDKN2A	3.26087	1.08696	5.78947	1.05263
30	CENPJ	4.34783	0	6.31579	0
31	CENPW	5.43478	0	5.26316	0
32	CEPT1	3.26087	0	5.26316	0
33	CERS2	6.52174	0	5.78947	0
34	CERT1	3.26087	0	3.15789	2.63158
35	CHCHD1	3.26087	0	6.31579	0
36	CHMP4B	3.26087	0	5.26316	1.05263
37	CHTOP	6.52174	0	5.78947	0
38	CIAO1	4.34783	0	5.26316	0
39	CIAO2A	3.26087	0	4.73684	0.526316
40	CIT	4.34783	0	4.73684	0.526316
41	CLPP	4.34783	1.08696	6.84211	1.05263
42	CLPX	3.26087	0	4.73684	0.526316
43	CLUH	2.17391	1.08696	3.68421	5.26316
44	CMPK1	3.26087	0	6.84211	0
45	CNN1	4.34783	0	7.36842	0.526316
46	COA5	4.34783	0	5.26316	0
47	COA6	6.52174	1.08696	6.84211	0
48	COPB2	4.34783	0	4.73684	0.526316
49	COPS5	10.8696	0	15.7895	0
50	COPZ1	4.34783	0	4.73684	0
51	COQ2	4.34783	1.08696	6.84211	1.05263
52	COQ7	4.34783	2.17391	4.73684	0
53	COX11	5.43478	0	6.84211	1.05263
54	COX14	4.34783	0	4.73684	0.526316
55	COX15	4.34783	0	6.31579	0
56	COX17	4.34783	0	4.73684	0.526316
57	COX18	4.34783	0	6.84211	0.526316
58	COX4I1	4.34783	3.26087	4.21053	2.63158
59	COX6B1	5.43478	0	6.84211	0.526316
60	COX7B	2.17391	48.913	2.10526	55.7895
61	COX7C	3.26087	0	2.63158	3.68421
62	CS	4.34783	0	4.73684	0
63	CSTF3	3.26087	0	7.36842	0.526316
64	CYC1	10.8696	0	15.2632	0
65	CYCS	2.17391	0	2.63158	5.78947
66	DARS1	3.26087	1.08696	5.26316	0.526316
67	DBR1	4.34783	0	4.73684	0.526316
68	DDX20	3.26087	0	5.26316	0
69	DHX15	4.34783	1.08696	6.31579	0
70	DLAT	3.26087	1.08696	9.47368	0
71	DLD	3.26087	2.17391	2.10526	7.89474
72	DNAJC11	3.26087	1.08696	6.31579	0.526316
73	DNM1L	4.34783	1.08696	4.21053	0
74	DNTTIP2	3.26087	0	6.31579	0
75	DOT1L	4.34783	1.08696	6.31579	5.26316
76	DPH1	2.17391	1.08696	3.68421	5.26316
77	DTYMK	3.26087	4.34783	5.26316	0.526316
78	DYNC1LI2	4.34783	4.34783	4.21053	1.05263
79	DYNLRB1	3.26087	0	5.26316	1.57895
80	EARS2	4.34783	2.17391	4.73684	0.526316
81	EGLN1	7.6087	2.17391	6.84211	0
82	EIF3I	3.26087	0	6.84211	0
83	EIF4G1	4.34783	0	4.73684	0.526316
84	ELOB	4.34783	1.08696	4.73684	1.57895
85	ENTPD3	4.34783	0	4.21053	1.05263
86	EPC2	3.26087	1.08696	5.26316	0
87	EXOC3	4.34783	0	5.78947	0.526316
88	FAM111A	3.26087	0	7.89474	0
89	FARS2	5.43478	0	5.26316	0
90	FASTKD5	3.26087	0	5.78947	0
91	FAU	2.17391	1.08696	7.89474	0
92	FDX1	3.26087	1.08696	9.47368	0
93	FOXM1	4.34783	1.08696	3.68421	0.526316
94	FPGS	3.26087	0	5.78947	0
95	FZD8	4.34783	0	5.78947	0
96	GADD45GIP1	4.34783	0	7.36842	0
97	GATB	4.34783	1.08696	6.84211	0
98	GATC	4.34783	0	4.73684	0
99	GBF1	4.34783	0	6.31579	0
100	GCLC	5.43478	0	5.26316	0
101	GCLM	3.26087	0	6.31579	0
102	GCSH	4.34783	5.43478	4.21053	2.10526
103	GFM1	4.34783	0	4.73684	1.05263
104	GGPS1	7.6087	0	6.84211	0
105	GLS	5.43478	2.17391	5.26316	0
106	GNL3	4.34783	0	4.21053	1.57895
107	GPX4	4.34783	2.17391	6.31579	4.73684
108	GSS	3.26087	0	5.26316	2.10526
109	GTF2B	3.26087	0	5.78947	0
110	GTPBP4	4.34783	0	6.31579	0
111	GTPBP6	5.43478	5.43478	6.31579	7.36842
112	H2AC6	6.52174	1.08696	5.26316	0
113	HARS2	6.52174	0	2.10526	6.31579
114	HAUS5	5.43478	0	6.84211	0.526316
115	HCCS	2.17391	50	2.63158	56.3158
116	HMBS	3.26087	1.08696	10	0.526316
117	HNRNPA2B1	2.17391	1.08696	2.63158	5.78947
118	HNRNPU	7.6087	0	6.84211	0
119	HSD17B10	2.17391	48.913	3.15789	55.7895
120	IDH2	4.34783	0	4.73684	0.526316
121	IDH3A	3.26087	0	4.73684	0.526316
122	IFT81	4.34783	0	4.73684	0
123	IMP4	5.43478	0	5.26316	0
124	INTS6	2.17391	2.17391	6.31579	0
125	KAT8	4.34783	1.08696	4.73684	1.05263
126	KIDINS220	3.26087	0	5.78947	0
127	KLF5	4.34783	1.08696	6.31579	0
128	KMT2A	3.26087	1.08696	9.47368	0
129	LARS2	3.26087	0	4.21053	1.57895
130	LDLR	4.34783	0	7.36842	0.526316
131	LIAS	4.34783	0	6.31579	0
132	LIPT1	4.34783	0	5.26316	0
133	LIPT2	4.34783	0	8.42105	0
134	LONP1	4.34783	1.08696	6.84211	1.05263
135	MAD2L2	3.26087	0	6.84211	0
136	MAN2C1	3.26087	0	4.73684	1.05263
137	MARCHF5	3.26087	1.08696	6.31579	0
138	MARS2	4.34783	0	5.26316	0
139	MAU2	4.34783	0	7.36842	0
140	MBTPS1	3.26087	4.34783	4.21053	2.63158
141	MBTPS2	2.17391	48.913	2.63158	55.7895
142	MCAT	3.26087	0	7.89474	0
143	MCM5	3.26087	2.17391	7.89474	0
144	MCMBP	3.26087	0	6.31579	0
145	MCUR1	6.52174	0	5.26316	0
146	MDH2	3.26087	0	2.63158	5.78947
147	MECR	3.26087	0	6.84211	0
148	METTL17	4.34783	0	4.73684	0
149	MFF	3.26087	3.26087	5.26316	0
150	MFN2	3.26087	0	6.84211	0
151	MPC1	6.52174	0	5.26316	0
152	MRM2	2.17391	0	2.63158	8.42105
153	MRPL12	7.6087	1.08696	6.84211	1.05263
154	MRPL13	10.8696	0	15.7895	0
155	MRPL14	5.43478	0	5.26316	0
156	MRPL15	10.8696	0	15.7895	0
157	MRPL16	4.34783	0	7.89474	0
158	MRPL17	3.26087	0	6.84211	0.526316
159	MRPL2	5.43478	0	5.26316	0
160	MRPL21	3.26087	0	8.42105	0
161	MRPL30	4.34783	0	5.26316	0
162	MRPL34	4.34783	0	7.36842	0
163	MRPL36	4.34783	0	5.26316	0.526316
164	MRPL40	3.26087	0	8.42105	0
165	MRPL41	3.26087	3.26087	6.31579	0
166	MRPL44	3.26087	3.26087	5.26316	0
167	MRPL51	4.34783	1.08696	4.21053	0.526316
168	MRPL52	3.26087	0	4.73684	0
169	MRPL53	3.26087	0	5.78947	0
170	MRPL55	7.6087	0	6.84211	0
171	MRPL57	5.43478	0	6.31579	0
172	MRPS11	3.26087	1.08696	4.73684	0.526316
173	MRPS12	5.43478	0	7.36842	0
174	MRPS14	6.52174	0	5.78947	0
175	MRPS16	3.26087	0	6.31579	0.526316
176	MRPS18A	5.43478	0	5.26316	0
177	MRPS18B	6.52174	0	5.26316	0
178	MRPS18C	4.34783	0	6.84211	0.526316
179	MRPS2	3.26087	0	5.78947	0.526316
180	MRPS21	6.52174	0	5.78947	0
181	MRPS22	4.34783	0	4.73684	0.526316
182	MRPS23	5.43478	0	6.84211	1.05263
183	MRPS25	4.34783	0	4.21053	1.05263
184	MRPS30	4.34783	0	5.26316	0.526316
185	MRPS33	3.26087	2.17391	2.10526	9.47368
186	MRPS5	4.34783	0	5.26316	0
187	MRPS7	7.6087	0	6.84211	1.57895
188	MRPS9	3.26087	0	5.26316	0
189	MRRF	3.26087	0	5.26316	0.526316
190	MTBP	10.8696	0	15.7895	0
191	MTERF1	3.26087	0	2.63158	7.36842
192	MTF1	3.26087	0	6.84211	0
193	MTG1	4.34783	0	8.42105	1.57895
194	MTIF3	4.34783	0	6.31579	0
195	MTO1	6.52174	0	5.26316	0
196	N6AMT1	4.34783	0	8.42105	1.05263
197	NAPA	5.43478	0	7.36842	0
198	NARS2	4.34783	1.08696	8.42105	0
199	NDUFA1	2.17391	48.913	2.10526	55.7895
200	NDUFA11	4.34783	1.08696	6.84211	1.05263
201	NDUFA6	3.26087	0	7.89474	0
202	NDUFA8	3.26087	0	5.26316	0.526316
203	NDUFA9	4.34783	1.08696	4.21053	0.526316
204	NDUFAF6	10.8696	0	15.2632	0
205	NDUFB10	4.34783	1.08696	4.73684	2.10526
206	NDUFB11	2.17391	48.913	2.63158	55.7895
207	NDUFB4	4.34783	0	4.73684	0.526316
208	NDUFB5	4.34783	0	4.73684	0.526316
209	NDUFB6	3.26087	0	5.26316	0
210	NDUFB7	4.34783	0	7.36842	0
211	NDUFB9	10.8696	0	15.7895	0
212	NDUFS1	3.26087	1.08696	5.26316	0
213	NDUFS2	6.52174	0	5.78947	0
214	NDUFS3	3.26087	0	7.36842	0
215	NDUFS6	4.34783	0	5.26316	0.526316
216	NDUFV1	3.26087	0	7.89474	0
217	NFYC	4.34783	0	6.84211	0
218	NOP2	4.34783	1.08696	4.21053	0.526316
219	NRF1	3.26087	2.17391	2.10526	10
220	NSF	7.6087	0	8.94737	1.05263
221	NUBPL	3.26087	0	5.26316	0
222	NUP133	7.6087	0	6.84211	0
223	OSBPL9	3.26087	0	6.84211	0
224	OXA1L	3.26087	0	4.73684	0
225	PARS2	3.26087	0	6.84211	0
226	PCBP2	4.34783	0	4.73684	0
227	PCGF6	4.34783	0	6.31579	0
228	PDE12	4.34783	2.17391	4.21053	1.05263
229	PDHA1	2.17391	48.913	2.63158	55.7895
230	PDHB	4.34783	1.08696	4.21053	1.05263
231	PDHX	4.34783	0	6.84211	1.05263
232	PDZD4	3.26087	48.913	2.10526	55.7895
233	PET100	4.34783	1.08696	7.36842	0
234	PET117	3.26087	1.08696	5.26316	0
235	PFKP	5.43478	0	6.84211	0
236	PGP	4.34783	1.08696	4.73684	2.10526
237	PHF5A	3.26087	0	7.89474	0
238	PITRM1	4.34783	0	5.78947	0
239	PMVK	6.52174	0	5.78947	0
240	POLG	4.34783	0	4.73684	0.526316
241	POLR2B	5.43478	0	6.84211	0.526316
242	POLR2K	10.8696	2.17391	15.2632	0
243	POT1	3.26087	2.17391	2.63158	10
244	PPA2	4.34783	0	6.84211	0.526316
245	PPIE	4.34783	0	6.84211	0
246	PRC1	4.34783	0	4.73684	0.526316
247	PRDM10	4.34783	0	10.5263	0
248	PRKDC	10.8696	0	15.2632	0
249	PSMA6	3.26087	0	5.26316	0
250	PSMB5	3.26087	0	4.73684	0
251	PSMD6	4.34783	1.08696	4.21053	1.05263
252	PTCD3	3.26087	0	5.78947	0
253	PTPMT1	3.26087	0	7.36842	0
254	PURG	10.8696	0	14.2105	0
255	QRSL1	5.43478	0	5.26316	0
256	RAD9A	3.26087	0	7.89474	0
257	RB1	2.17391	2.17391	6.31579	0
258	RCC1L	3.26087	0	2.63158	5.78947
259	REXO2	3.26087	2.17391	9.47368	0
260	RMND1	5.43478	0	5.26316	0
261	RPAIN	2.17391	1.08696	3.68421	5.26316
262	RPAP1	3.26087	0	4.73684	0.526316
263	RPL10A	5.43478	0	5.26316	0
264	RPL19	4.34783	0	6.84211	2.10526
265	RPL27	4.34783	0	6.84211	1.57895
266	RPL28	6.52174	0	7.36842	0
267	RPL3	3.26087	0	7.89474	0
268	RPL7A	3.26087	0	5.78947	0.526316
269	RPLP0	4.34783	0	4.73684	0
270	RPS19	5.43478	0	7.36842	0
271	RPS25	3.26087	1.08696	10	0.526316
272	RPS27A	3.26087	1.08696	5.78947	0
273	RPUSD3	4.34783	0	4.73684	0.526316
274	RPUSD4	5.43478	0	10.5263	0
275	RRN3	5.43478	2.17391	4.73684	0
276	RSL1D1	4.34783	2.17391	4.73684	0
277	RUVBL2	5.43478	0	7.36842	0
278	SAMM50	3.26087	0	7.89474	0
279	SARS2	5.43478	0	7.36842	0
280	SCAP	3.26087	0	4.21053	2.10526
281	SDHAF2	3.26087	0	7.89474	0
282	SGF29	5.43478	0	4.73684	0
283	SHMT2	4.34783	0	4.73684	0
284	SLC16A1	3.26087	0	5.26316	0
285	SLC25A19	7.6087	0	6.84211	1.57895
286	SLC25A26	4.34783	1.08696	4.21053	2.10526
287	SLC25A32	10.8696	0	15.2632	0
288	SLC25A39	5.43478	0	6.84211	1.05263
289	SLC25A51	3.26087	1.08696	5.26316	0
290	SLC7A5	4.34783	2.17391	4.21053	2.63158
291	SLFN11	4.34783	1.08696	6.84211	2.10526
292	SNAPIN	6.52174	0	5.78947	0
293	SOX2	4.34783	0	4.73684	0.526316
294	SPATA5	4.34783	0	6.84211	0
295	SPDYE1	2.17391	1.08696	2.63158	6.31579
296	SRP54	3.26087	0	5.26316	0
297	SSBP1	3.26087	2.17391	2.63158	9.47368
298	STARD7	4.34783	0	5.26316	0
299	STK11	4.34783	2.17391	6.31579	4.73684
300	SUPT16H	4.34783	0	4.73684	0
301	SURF6	3.26087	0	5.78947	0.526316
302	SYMPK	5.43478	0	7.36842	0
303	TADA2A	4.34783	0	6.84211	2.10526
304	TAF4	3.26087	0	5.26316	2.10526
305	TAF6L	3.26087	0	7.89474	0
306	TANK	5.43478	0	5.26316	0
307	TARS2	6.52174	0	5.78947	0
308	TEDC1	5.43478	0	9.47368	1.57895
309	TEFM	4.34783	1.08696	6.31579	3.68421
310	TFAM	3.26087	0	6.84211	0
311	TIMM9	3.26087	0	5.26316	0
312	TKT	4.34783	0	4.21053	1.57895
313	TMEM191B	4.34783	0	9.47368	0
314	TOP1MT	10.8696	0	15.2632	0
315	TPK1	3.26087	2.17391	2.10526	10
316	TRAIP	4.34783	0	4.21053	2.10526
317	TRAPPC11	6.52174	0	6.84211	0
318	TRIM32	3.26087	1.08696	5.26316	0.526316
319	TRRAP	3.26087	0	2.63158	7.36842
320	TSC22D2	4.34783	0	4.73684	0.526316
321	TUBGCP4	3.26087	0	4.73684	0.526316
322	TUT1	3.26087	0	7.89474	0
323	TWNK	4.34783	0	6.31579	0
324	U2SURP	5.43478	0	4.73684	0.526316
325	UBA2	5.43478	0	6.84211	0.526316
326	UBAP2L	6.52174	0	5.78947	0
327	UBE2I	4.34783	1.08696	4.73684	2.63158
328	UQCC1	3.26087	0	5.26316	2.10526
329	UQCC2	5.43478	0	5.26316	0
330	UQCR10	3.26087	0	7.89474	0
331	UQCRC1	3.26087	0	4.21053	2.10526
332	UQCRC2	4.34783	2.17391	4.73684	0
333	USE1	4.34783	0	7.36842	0
334	UTP25	8.69565	0	6.84211	0
335	VARS2	7.6087	0	5.26316	0
336	VPS45	6.52174	0	5.78947	0
337	WARS2	3.26087	0	5.78947	0
338	WDR12	3.26087	0	5.26316	0
339	XRN1	5.43478	0	4.73684	0.526316
340	YAE1	2.17391	1.08696	2.63158	6.84211
341	YARS2	4.34783	1.08696	4.21053	0
342	YEATS2	4.34783	0	4.73684	0.526316
343	ZBTB11	4.34783	1.08696	4.73684	0.526316
344	ZFAT	9.78261	0	15.7895	0
345	ZKSCAN5	3.26087	0	2.63158	7.36842
346	ZNF341	3.26087	0	5.26316	1.05263
347	ZNF365	3.26087	0	6.31579	0

## Sheet: S5 TARGET Unicox results
Unicox results for TARGET cohort
	Characteristics	Hazard.Ratio	CI95	P.Value
1	MFN2	1.3	1-1.68	0.048
2	PPIE	1.51	1.16-1.98	0.003
3	OSBPL9	1.29	1.04-1.61	0.02
4	DNTTIP2	1.26	1.07-1.5	0.007
5	GCLM	1.2	1.05-1.38	0.008
6	CEPT1	1.3	1.08-1.58	0.007
7	DDX20	1.24	1.02-1.51	0.031
8	SLC16A1	1.15	1.03-1.28	0.012
9	VPS45	1.21	1.02-1.43	0.027
10	CHTOP	1.45	1.07-1.98	0.017
11	MRPL55	0.72	0.56-0.94	0.014
12	NUP133	1.35	1.12-1.64	0.002
13	HNRNPU	1.31	1.02-1.67	0.031
14	KIDINS220	1.37	1.13-1.66	0.001
15	PTCD3	1.31	1.09-1.58	0.005
16	COA5	1.38	1.06-1.79	0.018
17	EPC2	1.3	1.04-1.62	0.022
18	TANK	1.25	1.01-1.54	0.039
19	GLS	1.24	1.04-1.49	0.019
20	MARS2	1.28	1.05-1.56	0.016
21	NDUFS1	1.33	1.07-1.67	0.012
22	BRPF1	1.32	1.05-1.66	0.017
23	ENTPD3	1.21	1.07-1.37	0.003
24	LARS2	1.28	1-1.64	0.047
25	SCAP	1.33	1.03-1.72	0.026
26	TRAIP	1.27	1.02-1.57	0.034
27	GNL3	1.44	1.15-1.8	0.001
28	TKT	0.76	0.62-0.92	0.006
29	PDE12	1.39	1.07-1.8	0.014
30	PDHB	1.44	1.07-1.94	0.017
31	PSMD6	1.34	1.03-1.73	0.028
32	DBR1	1.35	1.09-1.66	0.006
33	MRPS22	1.36	1.04-1.79	0.026
34	COPB2	1.28	1.08-1.53	0.005
35	U2SURP	1.4	1.16-1.69	0
36	TSC22D2	1.33	1.09-1.63	0.005
37	GFM1	1.54	1.22-1.94	0
38	DHX15	1.28	1.06-1.53	0.009
39	POLR2B	1.28	1.07-1.52	0.006
40	SPATA5	1.18	1.01-1.39	0.04
41	ABCE1	1.33	1.11-1.61	0.002
42	TRAPPC11	1.3	1.08-1.58	0.006
43	EXOC3	1.48	1.14-1.92	0.003
44	HARS2	1.27	1.01-1.6	0.039
45	GCLC	1.25	1.05-1.48	0.011
46	MTO1	1.39	1.07-1.81	0.013
47	HNRNPA2B1	1.41	1.1-1.81	0.007
48	SPDYE1	1.34	1.11-1.61	0.003
49	ZKSCAN5	1.37	1.07-1.75	0.012
50	DLD	1.29	1.04-1.58	0.018
51	POT1	1.19	1.02-1.39	0.026
52	PDHA1	1.41	1.09-1.84	0.01
53	MBTPS2	1.32	1.07-1.62	0.009
54	PRKDC	1.42	1.17-1.72	0
55	COPS5	1.4	1.09-1.78	0.007
56	NDUFAF6	1.31	1-1.7	0.047
57	SLC25A32	1.28	1.01-1.61	0.04
58	MTBP	1.33	1.12-1.59	0.001
59	ARHGEF39	1.24	1.04-1.47	0.016
60	SLC25A51	1.63	1.18-2.26	0.003
61	TRIM32	1.24	1.12-1.38	0
62	SURF6	1.35	1.06-1.72	0.015
63	RPL7A	0.7	0.53-0.93	0.013
64	PITRM1	1.43	1.09-1.87	0.01
65	TFAM	1.36	1.09-1.7	0.007
66	CDK1	1.23	1.09-1.39	0.001
67	COX15	1.27	1.03-1.56	0.025
68	GBF1	1.31	1.02-1.69	0.037
69	PCGF6	1.26	1.03-1.54	0.024
70	MCMBP	1.27	1-1.6	0.047
71	CAPRIN1	1.49	1.15-1.93	0.002
72	PDHX	1.29	1.05-1.57	0.013
73	API5	1.38	1.14-1.68	0.001
74	FAM111A	1.28	1.08-1.51	0.004
75	TUT1	1.26	1.01-1.56	0.04
76	FAU	0.69	0.54-0.89	0.005
77	RAD9A	1.36	1.06-1.75	0.017
78	ANKRD49	1.3	1.06-1.59	0.01
79	AASDHPPT	1.35	1.06-1.72	0.014
80	DLAT	1.36	1.08-1.72	0.009
81	RPS25	0.76	0.58-1	0.046
82	PRDM10	1.26	1.04-1.53	0.02
83	FOXM1	1.2	1.02-1.42	0.027
84	NDUFA9	1.4	1.03-1.92	0.034
85	NOP2	1.24	1.02-1.51	0.034
86	DNM1L	1.37	1.12-1.67	0.002
87	IFT81	1.21	1.04-1.41	0.015
88	CIT	1.28	1.1-1.49	0.002
89	RPLP0	0.69	0.54-0.88	0.003
90	CENPJ	1.31	1.11-1.55	0.001
91	KLF5	1.2	1.09-1.31	0
92	CDC16	1.35	1.11-1.64	0.003
93	METTL17	1.31	1.02-1.68	0.032
94	SUPT16H	1.33	1.07-1.67	0.011
95	NUBPL	1.23	1.01-1.49	0.042
96	SRP54	1.38	1.09-1.73	0.006
97	TUBGCP4	1.34	1.1-1.63	0.003
98	CLPX	1.29	1.02-1.63	0.037
99	POLG	1.44	1.14-1.82	0.002
100	PRC1	1.27	1.04-1.55	0.02
101	RRN3	1.25	1.05-1.49	0.011
102	DYNC1LI2	1.34	1.14-1.58	0
103	COX4I1	0.73	0.55-0.98	0.034
104	DPH1	1.34	1.05-1.72	0.02
105	TEFM	1.46	1.14-1.86	0.003
106	RPL19	0.71	0.54-0.91	0.008
107	RPL27	0.75	0.59-0.95	0.018
108	BRCA1	1.18	1.04-1.33	0.008
109	NSF	1.38	1.14-1.66	0.001
110	CDC27	1.25	1.05-1.48	0.012
111	COX11	1.41	1.14-1.73	0.001
112	CCDC137	1.39	1.05-1.83	0.02
113	PET117	1.33	1.07-1.65	0.011
114	LONP1	1.33	1.02-1.75	0.038
115	MAU2	1.38	1.05-1.8	0.019
116	UBA2	1.37	1.08-1.73	0.009
117	HAUS5	1.36	1.06-1.73	0.015
118	RPS19	0.76	0.61-0.96	0.022
119	RPL28	0.76	0.61-0.94	0.013
120	RPL3	0.76	0.59-0.99	0.039

## Sheet: S6 modle-data
Call:
glm(formula = status ~ TRAIP + FAU + TEFM + RPL19, family = "binomial",
data = data)
Deviance Residuals:
Min 1Q Median 3Q Max
-1.818 -1.114 0.787 1.053 1.819
Coefficients:
Estimate Std. Error z value Pr(>|z|)
(Intercept) 6.6916 4.2771 1.565 0.1177
TRAIP 0.1019 0.1893 0.538 0.5905
FAU -0.1321 0.4612 -0.286 0.7745
TEFM 0.4651 0.2180 2.134 0.0328 *
RPL19 -0.5291 0.5263 -1.005 0.3148

## Sheet: S7 Risk results
	TRAIP	FAU	PRDM10	TEFM	RPL19	status	OS	time	RiskScore	riskgroup
TARGET-20-PARYFN-04A	7.66534	14.513	10.1163	8.16491	16.1468	0	2203	6.03149	0.809844	high
TARGET-20-PASTUH-04A	7.57743	15.1673	8.93369	6.98868	17.4238	1	166	0.454483	-0.508333	low
TARGET-20-PARIMT-03A	7.27612	15.8212	10.236	8.98584	17.2735	0	2476	6.77892	0.383062	high
TARGET-20-PANBZH-09A	8.19967	16.3377	10.032	8.24793	17.7214	1	462	1.26489	-0.17131	low
TARGET-20-PANPLS-03A	7.44294	15.6976	10.4073	8.31741	17.0631	1	702	1.92197	0.216774	high
TARGET-20-PARJCR-09A	8.24317	16.4438	9.61839	9.13186	17.1796	1	468	1.28131	0.51692	high
TARGET-20-PASGWH-09A	6.67243	15.8593	9.50978	6.71425	17.4839	1	1214	3.32375	-0.851412	low
TARGET-20-PASBHI-09A	5.39232	16.2233	8.47168	6.50779	17.9692	0	2342	6.41205	-1.3827	low
TARGET-20-PARBFJ-09A	9.07682	16.4447	9.85019	8.65464	17.5598	0	2387	6.53525	0.178564	high
TARGET-20-PARCUK-09A	8.14466	16.4355	7.02237	5.58496	17.7465	1	279	0.76386	-1.44178	low
TARGET-20-PATIAK-04A	9.13443	16.5104	11.0954	9.12928	18.292	0	1464	4.00821	0.00915411	low
TARGET-20-PASVVS-09A	8.27612	15.0643	9.40514	7.30378	16.86	0	1968	5.38809	0.0213419	low
TARGET-20-PASXNR-04A	9.13699	15.3927	9.70044	8.01123	17.0198	1	542	1.48392	0.310137	high
TARGET-20-PAPAWN-09A	8.17991	15.6257	8.49985	8.0607	16.9697	0	2605	7.1321	0.23138	high
TARGET-20-PARXBT-09A	7.25739	14.2592	9.98868	7.2854	16.0837	0	2246	6.14921	0.426079	high
TARGET-20-PAKERZ-09A	9.92481	15.573	10.7624	8.37069	17.1636	1	397	1.08693	0.457684	high
TARGET-20-PASWPT-09A	8.10852	15.5341	10.8009	9.07146	16.8125	1	518	1.41821	0.789558	high
TARGET-20-PARAJX-09A	8.49586	16.7905	7.82655	5.67243	17.7262	0	2803	7.6742	-1.40146	low
TARGET-20-PARYFN-03A	6.75489	15.3143	10.3287	8.27146	16.9347	0	2203	6.03149	0.243935	high
TARGET-20-PARHVK-09A	7.81378	15.7016	10.3696	8.07146	17.9208	0	2516	6.88843	-0.314148	low
TARGET-20-PANKFZ-09A	7.76818	16.7342	8.02791	6.2854	17.8903	0	3116	8.53114	-1.26985	low
TARGET-20-PARUNX-09A	7.78136	15.3029	9.38586	8.02791	16.57	0	2364	6.47228	0.429629	high
TARGET-20-PAPVZK-09A	7.55459	16.6841	8.75822	7.2854	18.0055	0	2492	6.82272	-0.880823	low
TARGET-20-PANKNB-09A	8.633	15.9598	7.76155	6.26679	17.0997	0	443	1.21287	-0.669808	low
TARGET-20-PATJHJ-09A	8.52356	16.0023	10.374	9.52552	17.5779	1	607	1.66188	0.576181	high
TARGET-20-PARZUU-09A	8.9542	15.4845	10.8368	9.21675	17.1403	0	2168	5.93566	0.776383	high
TARGET-20-PAPWYK-09A	8.12928	16.3848	9.04166	6.85798	17.4268	1	199	0.544832	-0.675388	low
TARGET-20-PANVGP-03A	7.45121	15.4121	10.1072	6.9542	16.832	0	2688	7.35934	-0.256443	low
TARGET-20-PAMYAS-09A	8.50383	16.1659	8.86419	7.98299	17.5946	0	3263	8.93361	-0.173742	low
TARGET-20-PADYIR-04A	8.85798	15.2123	11.279	7.94837	16.9226	1	585	1.60164	0.327749	high
TARGET-20-PAPVCN-09A	6.56986	16.619	7.55459	6.88264	17.6035	0	2592	7.09651	-0.947195	low
TARGET-20-PARBRA-09A	8.78136	16.4263	8.77479	7.2854	17.5575	1	1362	3.72895	-0.484749	low
TARGET-20-PARVAI-03A	7.61471	14.2976	9.92778	7.86419	15.7962	1	429	1.17454	0.878752	high
TARGET-20-PANUUA-09A	8.33985	16.7135	9.04439	7.45943	17.9768	1	1767	4.83778	-0.708572	low
TARGET-20-PANDER-09A	7.33985	15.9906	8.74147	7.02237	17.365	0	3291	9.01027	-0.594539	low
TARGET-20-PARPDS-09A	9.59805	15.9179	10.6618	8.66534	17.4009	1	836	2.28884	0.390343	high
TARGET-20-PAEFGT-03A	6.39232	15.0946	8.7879	7.70044	16.8697	1	315	0.862423	0.00478586	low
TARGET-20-PARWDZ-09A	9.37069	14.8613	9.92778	8.60733	16.6174	1	321	0.87885	0.894325	high
TARGET-20-PASCGR-03A	8.64746	15.7098	10.7423	8.19476	17.4101	1	702	1.92197	0.0972617	low
TARGET-20-PARFAL-09A	10.0265	15.8713	11.7891	9.65464	17.2909	1	378	1.03491	0.958513	high
TARGET-20-PADYIR-09A	8.13443	16.1198	10.8486	8.49185	17.556	1	585	1.60164	0.0517922	low
TARGET-20-PASHYZ-04A	7.19967	13.9674	8.01123	7.13955	15.7131	1	433	1.18549	0.586998	high
TARGET-20-PASPTM-09A	6.89482	14.5588	9.46964	7.25739	16.0862	0	1900	5.20192	0.335196	high
TARGET-20-PASTUH-03A	8.98014	14.8842	10.5641	8.01123	16.1683	1	166	0.454483	0.811863	high
TARGET-20-PARCCH-03A	9.35535	15.6039	10.3004	8.32643	17.1752	1	228	0.62423	0.368904	high
TARGET-20-PANYSN-03A	8.27612	15.7648	10.5736	8.53138	17.4025	0	914	2.5024	0.212736	high
TARGET-20-PAPVDV-03A	7.53138	15.1333	10.3966	8.59246	16.6572	0	2688	7.35934	0.643032	high
TARGET-20-PANLIR-09A	8.60733	14.3626	10.0888	8.09803	16.1252	0	3238	8.86516	0.905989	high
TARGET-20-PASJGZ-04A	8.76487	15.5035	9.76487	8.33985	16.4705	1	462	1.26489	0.701083	high
TARGET-20-PASMYS-04A	8.01123	15.6167	10.2095	8.30378	17.2673	0	1888	5.16906	0.170988	high
TARGET-20-PANHYK-09A	7.43463	15.6624	9.52943	8.20457	17.3727	0	1675	4.5859	0.00430441	low
TARGET-20-PARBIU-04A	8.5157	15.0785	10.0861	8.00562	17.3497	1	917	2.51061	0.111246	low
TARGET-20-PANPTM-09A	7.73471	16.2779	8.37938	7.20945	17.4393	0	3130	8.56947	-0.54456	low
TARGET-20-PANYNR-03A	7.46761	15.0352	9.59805	7.39232	16.5835	0	2952	8.08214	0.130253	low
TARGET-20-PARYVW-04A	10.2432	15.552	10.3729	8.8009	17.1007	0	2317	6.3436	0.726266	high
TARGET-20-PAEDKB-04A	9.58684	16.2398	11.0755	9.87652	17.6824	1	800	2.19028	0.761097	high
TARGET-20-PATIAK-09A	8.08746	15.5868	10.1408	7.36632	17.0913	0	1464	4.00821	-0.160227	low
TARGET-20-PARJYP-03A	8.89482	16.7132	9.54303	8.29002	17.9241	0	1798	4.92266	-0.237751	low
TARGET-20-PANSBH-09A	7.88264	14.88	9.74987	8.24793	16.3521	1	813	2.22587	0.713466	high
TARGET-20-PAMYGX-09A	8.50383	14.9941	10.813	8.43463	16.5115	0	3380	9.25394	0.764169	high
TARGET-20-PARGVC-03A	8.08215	16.9084	8.21917	6.65821	17.4277	1	295	0.807666	-0.842723	low
TARGET-20-PASVYA-04A	8.56224	15.5359	10.0741	7.99435	16.8419	1	630	1.72485	0.318928	high
TARGET-20-PANTPW-09A	6.97728	16.4331	8.57743	6.85798	17.7707	0	2946	8.06571	-0.981034	low
TARGET-20-PASBBE-04A	9.45943	15.7108	9.77149	8.56605	17.4374	0	2244	6.14374	0.338109	high
TARGET-20-PARXMP-09A	9.52356	15.4649	11.3476	8.58871	16.7951	0	1903	5.21013	0.727503	high
TARGET-20-PASMHY-03A	7.07682	15.4262	10.1189	8.24793	16.8659	1	592	1.62081	0.287359	high
TARGET-20-PASBPK-09A	7.32193	16.3461	8.35315	7.48382	17.9347	0	2117	5.79603	-0.730086	low
TARGET-20-PASPGA-09A	8.58871	15.9589	10.0755	8.75489	17.1199	1	1729	4.73374	0.472442	high
TARGET-20-PAECCE-09A	8.3443	15.7098	10.1774	8.60363	17.1191	1	147	0.402464	0.410503	high
TARGET-20-PASFEW-09A	9.10066	14.8097	10.2312	8.42206	16.1903	1	313	0.856947	1.01344	high
TARGET-20-PASWLN-09A	8.44708	16.2541	11.7805	8.48784	17.5659	1	614	1.68104	0.0588388	low
TARGET-20-PANLIZ-09A	8.08746	16.1071	9.7211	8.56224	18.1632	1	784	2.14648	-0.239808	low
TARGET-20-PAEFGT-04A	8.9629	14.9729	9.88722	8.62571	16.8867	1	315	0.862423	0.70414	high
TARGET-20-PARDDY-09A	8.61471	15.2785	10.1737	7.76155	17.2771	1	766	2.09719	0.0197442	low
TARGET-20-PAPXRJ-09A	8.31288	15.2643	11.2568	7.74147	17.004	1	1248	3.41684	0.126043	low
TARGET-20-PAKLPD-09A	8.67948	16.4542	8.32643	6.35755	17.3309	0	2707	7.41136	-0.81049	low
TARGET-20-PASIBG-09A	8.90689	15.5838	10.4533	8.93074	17.3819	1	1094	2.99521	0.497586	high
TARGET-20-PANLJN-09A	8.56224	15.9709	8	7.27612	16.9726	0	2133	5.83984	-0.14177	low
TARGET-20-PASYJI-04A	8.62571	16.2212	11.2603	8.01681	17.6402	0	1780	4.87337	-0.177071	low
TARGET-20-PARMZF-09A	8.06609	16.4075	9.2854	7.39232	17.6474	0	2193	6.00411	-0.55296	low
TARGET-20-PARSHM-03A	7.32193	15.6435	10.6092	8.0607	17.3042	0	2450	6.70773	-0.0353369	low
TARGET-20-PANLKB-09A	6.87036	16.2996	8.38802	5.08746	16.8337	0	1985	5.43463	-1.30212	low
TARGET-20-PAMYAS-04A	7.20945	15.1441	7.94837	6.20945	16.8282	0	3263	8.93361	-0.59009	low
TARGET-20-PASPLU-04A	9.03892	14.2553	10.7271	8.47168	16.5492	1	351	0.960986	0.913592	high
TARGET-20-PASHYZ-09A	8.24793	16.0981	9.56415	8.07682	17.5523	1	433	1.18549	-0.124873	low
TARGET-20-PALGKX-04A	8.42206	14.7236	9.81698	7.57743	16.3508	1	485	1.32786	0.47788	high
TARGET-20-PANUTB-09A	7.6865	15.5605	9.87191	7.3837	17.3772	1	925	2.53251	-0.340766	low
TARGET-20-PASINN-04A	8.49586	15.5635	10.2515	8.15987	16.9749	1	843	2.30801	0.315167	high
TARGET-20-PARSAN-03A	7.5157	15.1395	9.49785	7.85798	16.7191	1	870	2.38193	0.266231	high
TARGET-20-PARTAL-09A	8.43879	15.7277	9.83763	8.40939	17.333	1	531	1.4538	0.214227	high
TARGET-20-PARBIU-09A	9.57365	15.5828	10.4083	9.12928	17.5289	1	917	2.51061	0.580236	high
TARGET-20-PANAEV-09A	7.31288	15.5778	9.52356	5.67243	16.509	0	2767	7.57563	-0.717755	low
TARGET-20-PATDNN-09A	7.39232	16.0896	8.55842	7.26679	17.3426	1	194	0.531143	-0.47671	low
TARGET-20-PANINI-09A	8.93958	17.159	8.3837	7.42626	18.259	0	3144	8.6078	-0.871056	low
TARGET-20-PARUWX-09A	7.50779	15.9902	9.90689	7.79442	17.3991	1	439	1.20192	-0.236307	low
TARGET-20-PATELT-03A	8.37069	15.6884	10.611	8.91886	17.2972	0	1652	4.52293	0.468405	high
TARGET-20-PARYGA-09A	7.2384	15.3974	9.16993	6.89482	16.8898	0	2406	6.58727	-0.334412	low
TARGET-20-PANLLX-09A	8.86728	15.5261	10.9708	9.07146	17.1359	0	3234	8.85421	0.69676	high
TARGET-20-PARXNG-09A	8.93664	15.1413	10.0901	8.82337	16.7902	0	2246	6.14921	0.822168	high
TARGET-20-PARPWL-09A	7.85175	16.5878	9.28309	8.09803	17.9975	0	1199	3.28268	-0.45559	low
TARGET-20-PANKKE-09A	8.36194	16.4502	9.3443	7.79442	17.6836	0	3149	8.62149	-0.36061	low
TARGET-20-PANFMG-09A	8.23362	15.8945	9.6987	7.49185	18.0921	0	3253	8.90623	-0.657093	low
TARGET-20-PAKTCX-09A	8.633	15.5443	9.62753	7.33985	17.2198	1	1896	5.19097	-0.179347	low
TARGET-20-PARUBT-40A	7.49185	14.6878	8.78136	7.26679	16.2955	1	586	1.60438	0.272629	high
TARGET-20-PASHBI-09A	9.14211	15.77	11.1699	8.77479	17.0782	0	1335	3.65503	0.585107	high
TARGET-20-PAKIYW-09A	8	15.6887	8.71081	7.29462	17.4451	0	2965	8.11773	-0.403128	low
TARGET-20-PAEERJ-09A	9.00562	15.0518	10.3476	8.47168	16.8466	1	373	1.02122	0.647623	high
TARGET-20-PASLSD-03A	7.46761	15.0472	9.45121	6.39232	16.5453	0	2126	5.82067	-0.316214	low
TARGET-20-PARCZL-04A	8.53916	15.6573	9.6865	8.27146	17.7429	0	2695	7.37851	-0.0472542	low
TARGET-20-PAEIKD-09A	7.99435	15.5219	10.3387	8.03892	17.3277	0	3600	9.85626	0.0266505	low
TARGET-20-PASVYA-09A	7.73471	15.2979	9.51373	8.06609	16.284	1	630	1.72485	0.594622	high
TARGET-20-PASPLU-09A	8.53916	15.0224	10.3095	8.90388	16.7215	1	351	0.960986	0.871189	high
TARGET-20-PAPBEJ-09A	9.50779	15.727	13.2353	8.55075	16.9929	1	404	1.10609	0.568921	high
TARGET-20-PATDNN-04A	8.33092	16.4128	8.91289	8.26209	18.1071	1	194	0.531143	-0.365328	low
TARGET-20-PARLVL-04A	7	14.787	9.61471	7.59991	16.3683	1	1979	5.41821	0.325851	high
TARGET-20-PARASV-03A	9.25739	16.4118	8.35755	7.65821	17.7438	1	749	2.05065	-0.359518	low
TARGET-20-PARTAL-04A	8.08746	14.9749	9.71939	7.49985	16.7029	1	531	1.4538	0.188224	high
TARGET-20-PARKCX-09A	9.63844	15.3672	9.59805	8.10329	17.1136	0	2760	7.55647	0.357806	high
TARGET-20-PANDIX-09A	8.88874	16.0606	11.0694	7.96578	17.9335	0	3069	8.40246	-0.307963	low
TARGET-20-PANVGE-09A	6.44294	16.1619	6.47573	4.45943	17.0808	0	2819	7.718	-1.75031	low
TARGET-20-PASGGK-03A	8.48784	15.0192	9.80574	7.66534	16.7731	0	2025	5.54415	0.263008	high
TARGET-20-PASVVS-04A	8.97441	15.9335	10.3652	9.16239	17.6329	0	1968	5.38809	0.433233	high
TARGET-20-PAEERJ-04A	8.47978	15.571	10.1561	8.58496	17.2251	1	373	1.02122	0.377871	high
TARGET-20-PANSJB-09A	7.84549	17.2141	8.91289	8.09276	18.184	1	422	1.15537	-0.640122	low
TARGET-20-PATDHA-09A	8.26209	16.715	9.87498	7.74819	17.507	1	403	1.10335	-0.333801	low
TARGET-20-PAKTCX-04A	7.82655	15.2325	8.89482	7.85175	17.0281	1	1896	5.19097	0.119248	low
TARGET-20-PARUDL-03A	7.53138	15.9017	9.78627	7.75489	17.4086	0	2411	6.60096	-0.245634	low
TARGET-20-PANGDN-09A	8.99718	14.8308	9.83605	8.24317	16.5719	0	3063	8.38604	0.714994	high
TARGET-20-PARANT-09A	7.45121	16.1037	8.89178	7.19967	17.4971	0	2509	6.86927	-0.585534	low
TARGET-20-PASMGW-09A	7.97154	14.5934	10.4666	7.2384	16.3117	1	286	0.783025	0.312204	high
TARGET-20-PASXYG-09A	7.19967	15.9639	9.47978	8.11374	17.6235	1	570	1.56057	-0.234384	low
TARGET-20-PARDMG-09A	7.87652	15.0626	10.3487	8.21917	16.886	1	413	1.13073	0.392883	high
TARGET-20-PANGCM-03A	7.2854	17.2671	8.87652	6.62936	18.0373	0	3055	8.36413	-1.30724	low
TARGET-20-PANLIZ-04A	9.35535	15.8997	9.78463	8.81378	17.783	1	784	2.14648	0.234936	high
TARGET-20-PASWAT-09A	6.10852	16.4597	10.4263	7.74819	17.3533	1	342	0.936345	-0.438121	low
TARGET-20-PARCZL-09A	5.70044	15.8693	12.6629	7.41785	17.6986	0	2695	7.37851	-0.738064	low
TARGET-20-PAKSMZ-03A	8.90689	15.033	10.5536	8.31741	16.3911	1	1293	3.54004	0.809263	high
TARGET-20-PASGMZ-09A	7.98299	15.5189	10.5831	8.35315	17.0104	1	789	2.16016	0.339947	high
TARGET-20-PASJTM-09A	7.16993	13.378	10.1624	8.05528	15.0478	0	1953	5.34702	1.43979	high
TARGET-20-PAEIKD-04A	8.78463	15.7542	9.22159	7.21917	17.805	0	3600	9.85626	-0.557372	low
TARGET-20-PARYVW-09A	8.25739	15.2256	10.8533	8.49985	16.738	0	2317	6.3436	0.619004	high
TARGET-20-PASCRZ-04A	7.63662	13.8958	9.29002	7.52356	15.349	1	339	0.928131	1.01222	high
TARGET-20-PANZKA-09A	8.17493	16.6999	8.14466	7.22882	18.1111	0	2824	7.73169	-0.901892	low
TARGET-20-PASTTW-09A	8.69	14.7301	10.1007	8.29002	16.0629	1	600	1.64271	0.988097	high
TARGET-20-PARENB-09A	8.55075	15.1643	11.8234	8.23362	17.014	0	314	0.859685	0.387094	high
TARGET-20-PADZCG-04A	7.87036	14.2343	9.67948	7.8009	15.7591	1	536	1.46749	0.903362	high
TARGET-20-PASGWH-04A	9.98726	15.6826	10.7838	8.85487	17.383	1	1214	3.32375	0.558684	high
TARGET-20-PANPKN-09A	8.35755	15.709	11.2894	6.84549	17.2376	0	3630	9.9384	-0.468496	low
TARGET-20-PAKIWK-04A	10.3608	15.7164	10.7168	9.02514	17.286	0	112	0.306639	0.722845	high
TARGET-20-PARZWH-09A	8.75489	16.5548	10.545	8.94251	18.0757	0	2151	5.88912	-0.00776517	low
TARGET-20-PAPWIU-09A	7.66534	16.9233	7.53138	6.30378	17.5621	0	2829	7.74538	-1.12314	low
TARGET-20-PAPXWI-09A	8.85487	17.4487	8.73809	6.91886	17.5709	0	880	2.40931	-0.789932	low
TARGET-20-PANNHB-09A	7.22882	15.6451	9.65821	8.2854	17.1616	1	436	1.1937	0.134923	low
TARGET-20-PAPWHS-09A	7.97154	16.4991	7.84549	5	17.5733	0	2687	7.35661	-1.64826	low
TARGET-20-PARFAL-04A	9.12412	15.1162	11.1874	8.59246	16.1266	1	378	1.03491	1.08831	high
TARGET-20-PANTNA-09A	9.59432	16.6017	8.29921	7.56224	17.5141	1	1152	3.154	-0.273361	low
TARGET-20-PAKIWK-09A	9.64205	15.3601	10.151	8.67948	16.6009	0	112	0.306639	0.898358	high
TARGET-20-PARDDY-04A	5.20945	12.6856	5.9542	4.16993	13.4607	1	766	2.09719	0.364005	high
TARGET-20-PADZCG-09A	8.60733	15.5311	10.8611	9.1472	17.0686	1	536	1.46749	0.740474	high
TARGET-20-PAPXRJ-04A	8.53138	16.2003	9.37721	8.04439	18.0395	1	1248	3.41684	-0.382305	low
TARGET-20-PASZLJ-09A	9.11894	14.8733	10.1421	9.13443	17.227	1	289	0.791239	0.789741	high
TARGET-20-PANLXM-09A	8.74483	15.3727	10.3399	8.13443	16.8742	1	390	1.06776	0.407198	high
TARGET-20-PARUTH-09A	7.48382	17.2847	9.74315	6.9542	18.4612	1	1412	3.86585	-1.36252	low
TARGET-20-PASWAJ-09A	8.77149	15.7865	8.50779	8.28077	17.2343	0	1712	4.6872	0.232778	high
TARGET-20-PARUNX-04A	9.35535	16.1889	10.7381	9.21432	17.7942	0	2364	6.47228	0.37708	high
TARGET-20-PASSSI-09A	9.06878	15.8101	8.91289	7.97154	17.4171	1	712	1.94935	0.0194093	low
TARGET-20-PASGZS-04A	9.19967	15.4237	10.952	8.26679	17.1476	1	278	0.761123	0.363705	high
TARGET-20-PASYJI-09A	8.49586	16.7481	8.65821	7.87652	17.9166	0	1780	4.87337	-0.471424	low
TARGET-20-PAEFGR-09A	6.20945	15.0891	9.4818	7.5157	16.7111	0	4022	11.0116	-0.0151218	low
TARGET-20-PASPKE-09A	6.82018	16.8066	10.543	7.93074	17.6694	0	2026	5.54689	-0.493832	low
TARGET-20-PASVYL-09A	9.37287	15.5941	10.3848	9.72281	17.1259	1	286	0.783025	1.04758	high
TARGET-20-PAKVGI-09A	8.15987	14.9509	9.79604	7.71425	16.6603	1	1229	3.36482	0.321065	high
TARGET-20-PANGTF-09A	9.25503	15.5101	9.78136	7.2854	17.1617	1	616	1.68652	-0.106036	low
TARGET-20-PATJHJ-40A	7.75489	14.9284	9.14466	6.72792	16.6674	1	607	1.66188	-0.179754	low
TARGET-20-PARIHK-03A	7.13955	15.8744	10.2796	8.99435	17.5019	1	923	2.52704	0.245271	high
TARGET-20-PAEAKL-09A	10.352	16.4539	9.04712	7.58496	17.0304	1	163	0.44627	0.089809	low
TARGET-20-PARUUB-09A	9.29002	15.2153	10.1699	8.82337	17.0017	0	1882	5.15264	0.736535	high
TARGET-20-PAKERZ-04A	9.1472	15.9213	11.3515	9.24555	17.3692	1	397	1.08693	0.630639	high
TARGET-20-PAMVKZ-09A	8.64024	15.9808	9.47168	8.54303	17.5527	1	693	1.89733	0.147247	low
TARGET-20-PALGKX-09A	6.58496	15.592	9.85643	8.11374	17.4649	1	485	1.32786	-0.163962	low
TARGET-20-PASWAJ-04A	8.90087	15.5558	10.8186	7.97728	17.1522	0	1712	4.6872	0.178703	high
TARGET-20-PARIZR-03A	8.01681	15.784	10.3772	8.47978	17.0317	0	2457	6.7269	0.355968	high
TARGET-20-PASWPD-09A	7.20945	14.9937	11.3864	7.96	16.8461	1	689	1.88638	0.234583	high
TARGET-20-PANGJY-09A	10.4808	16.7489	8.02237	7.33092	17.1542	0	2983	8.16701	-0.11974	low
TARGET-20-PASCFW-09A	9.7039	15.6386	9.48583	8.47168	17.5403	0	2205	6.03696	0.27418	high
TARGET-20-PANWHP-09A	5.32193	15.9023	8.224	6.94251	17.0081	0	2738	7.49624	-0.636737	low
TARGET-20-PABLDZ-04A	7.21917	16.4013	9.16491	7.71425	17.8598	0	721	1.97399	-0.601063	low

## Sheet: S8 Cox-analysis
OS.univariate-Cox						OS.mutivariate-Cox
	Characteristics	Hazard.Ratio	CI95	P.Value			Characteristics	Hazard.Ratio.x	CI95.x	P.Value.x	Hazard.Ratio.y	CI95.y	P.Value.y
1	RiskScore	2.21	1.53-3.18	0		1	age.group	1.53	1.02-2.29	0.04	1.89	1.12-3.19	0.016
2	Gender	0.74	0.49-1.11	0.14		2	BM.group	1.13	0.75-1.71	0.567	1.19	0.71-2	0.52
3	Race	1.07	0.89-1.29	0.457		3	CEBPA.mutation	0.14	0.02-0.99	0.048	0.13	0.02-1	0.05
4	Fab.category	1	0.88-1.14	0.99		4	Fab.category	1	0.88-1.14	0.99	1.03	0.88-1.21	0.676
5	WT1.mutation	2.61	1.35-5.05	0.004		5	FLT3.ITD.mutation	2.54	1.41-4.58	0.002	3.15	1.36-7.28	0.007
6	FLT3.ITD.mutation	2.54	1.41-4.58	0.002		6	Gender	0.74	0.49-1.11	0.14	0.78	0.47-1.29	0.332
7	NPM.mutation	0.96	0.73-1.27	0.785		7	NPM.mutation	0.96	0.73-1.27	0.785	0.9	0.63-1.27	0.536
8	CEBPA.mutation	0.14	0.02-0.99	0.048		8	Race	1.07	0.89-1.29	0.457	0.88	0.7-1.09	0.241
9	age.group	1.53	1.02-2.29	0.04		9	Risk.group	1.27	0.87-1.86	0.213	1.41	0.92-2.18	0.116
10	WBC.group	1.2	0.69-2.08	0.517		10	RiskScore	2.21	1.53-3.18	0	1.84	1.17-2.88	0.008
11	BM.group	1.13	0.75-1.71	0.567		11	WBC.group	1.2	0.69-2.08	0.517	0.38	0.14-1	0.049
12	Risk.group	1.27	0.87-1.86	0.213		12	WT1.mutation	2.61	1.35-5.05	0.004	2.2	0.93-5.2	0.072
EFS.univariate-Cox						EFS.mutivariate-Cox
	Characteristics	Hazard.Ratio	CI95	P.Value			Characteristics	Hazard.Ratio.x	CI95.x	P.Value.x	Hazard.Ratio.y	CI95.y	P.Value.y
1	RiskScore	2.21	1.53-3.18	0		1	age.group	1.53	1.02-2.29	0.04	1.89	1.12-3.19	0.016
2	Gender	0.74	0.49-1.11	0.14		2	BM.group	1.13	0.75-1.71	0.567	1.19	0.71-2	0.52
3	Race	1.07	0.89-1.29	0.457		3	CEBPA.mutation	0.14	0.02-0.99	0.048	0.13	0.02-1	0.05
4	Fab.category	1	0.88-1.14	0.99		4	Fab.category	1	0.88-1.14	0.99	1.03	0.88-1.21	0.676
5	WT1.mutation	2.61	1.35-5.05	0.004		5	FLT3.ITD.mutation	2.54	1.41-4.58	0.002	3.15	1.36-7.28	0.007
6	FLT3.ITD.mutation	2.54	1.41-4.58	0.002		6	Gender	0.74	0.49-1.11	0.14	0.78	0.47-1.29	0.332
7	NPM.mutation	0.96	0.73-1.27	0.785		7	NPM.mutation	0.96	0.73-1.27	0.785	0.9	0.63-1.27	0.536
8	CEBPA.mutation	0.14	0.02-0.99	0.048		8	Race	1.07	0.89-1.29	0.457	0.88	0.7-1.09	0.241
9	age.group	1.53	1.02-2.29	0.04		9	Risk.group	1.27	0.87-1.86	0.213	1.41	0.92-2.18	0.116
10	WBC.group	1.2	0.69-2.08	0.517		10	RiskScore	2.21	1.53-3.18	0	1.84	1.17-2.88	0.008
11	BM.group	1.13	0.75-1.71	0.567		11	WBC.group	1.2	0.69-2.08	0.517	0.38	0.14-1	0.049
12	Risk.group	1.27	0.87-1.86	0.213		12	WT1.mutation	2.61	1.35-5.05	0.004	2.2	0.93-5.2	0.072

## Sheet: S9 Clinical data characters
No.	Sample source	FAB	Gender	Age	Baseline WBC(×109)	Baseline BM Blast(%)	Gene mutation	Karyotype	Treatment	CR after 1 cycle	EFS(months)	OS(months)	FAU%	TEFM%	RPL19%	TRAIP%	Risk Group	Risk Score
1	BM	M3	F	9	44.9	-	PML/RARA+, FLT3/ITD+	46，XX，t(15,17)(q24,q21)	ATRA+RIF+MA	YES	60.8	60.8	0.777218	5.38012	1.28605	13.5653	High	3.10251
2	BM	M2b	F	16	102	0.27	AML1/ETO+	46，XX,t(8,21)(q22,q22)	IDA+Ara-C+VP16	YES	58.2333	58.2333	1.53608	26.2312	4.14557	38.1764	High	13.6958
3	BM	M5b	F	11	47.15	0.28	CBFβ/MYH11+	-	IDA+Ara-C+VP16	YES	54.5	54.5	0.886867	5.63289	2.20876	12.9368	Low	2.65335
4	BM	M4	F	8	11.54	0.32	negative	47，XX,+8{20}	IDA+Ara-C+VP16	NO	52.7	52.7	1.04142	6.41193	2.13992	12.231	Low	2.95962
5	BM	M4	M	5	14.35	0.62	AML1/ETO+，FLT3/ITD+	46，XY,t(8,21)(q22,q22)	IDA+Ara-C+VP16	YES	49.8333	49.8333	1.48983	7.67975	2.62372	9.47649	Low	2.95308
6	BM	M5b	M	19m	4.1	0.82	MLL/AF9+	46,XY,t(9,11)(p22,q23)	IDA+Ara-C+VP16	YES	48.9	48.9	1.15421	6.44409	2.4883	27.2471	High	4.30703
7	BM	M3	F	6	4.56	0.89	PML/RARA（bcr1)+	-	ATRA+RIF+DNR	YES	48.9333	48.9333	1.19315	7.27182	2.33905	8.63786	Low	2.8676
8	BM	M3	M	6	2.7	0.775	PML/RARA（bcr1)+	47,XY,+8(5)/46,XY(15)	ATRA+ATO+IDA	YES	47.5	47.5	1.71843	14.9469	3.25077	14.0494	High	6.43683
9	BM	M3	M	6	3.95	0.87	PML/RARA+	46，XY，t(15,17)(q24,q21)[20]	ATRA+ATO+IDA	YES	46.2	46.2	0.989529	8.61745	1.82512	17.211	High	4.66653
10	BM	M3	M	5	32.85	0.9	PML/RARA+	46，XY，t(15,17)(q22,q21)	ATRA+RIF+IDA	YES	44.1	44.1	0.300855	3.8938	0.550439	3.71813	Low	1.85897
11	BM	M5b	F	10m	263	0.74	MLL/ELL+	46，XX，i(10)(q10),t(11,19)(q23,p13)	IDA+Ara-C+VP16	YES	43.8667	43.8667	0.455669	3.9612	1.18833	16.3448	Low	2.82035
12	BM	M5	M	8	2.97	0.24	negative	46，XY	IDA+Ara-C+VP16	YES	42.7333	42.7333	1.49838	8.92422	3.086	8.62694	High	3.19943
13	BM	M5b	M	12	6.2	0.52	negative	-	IDA+Ara-C+VP16	YES	41.2	41.2	1.30233	7.50625	2.57945	27.0422	High	4.71228
14	BM	M2a	M	2	45.53	0.88	negative	46，XY，der(8)(8;11)(q24,p21)	IDA+Ara-C+VP16	YES	40.7667	40.7667	0.91327	18.8765	2.12439	280.516	High	36.1459
15	BM	M2	M	13	2.89	0.485	AML1/ETO+	45，X，-Y，t(8,21)(q22,q22)[20]	IDA+Ara-C+VP16	YES	39.8	39.8	1.09816	8.96331	2.74594	18.0673	High	4.41325
16	BM	M5b	F	8m	496	-	-	-	-	-	1	1	0.764675	3.17697	1.02072	10.7228	Low	1.93012
17	BM	M4Eo	M	6	110.14	-	-	-	-	-	13d	13d	0.588417	4.36478	0.933562	2.72624	Low	1.73617
18	BM	M2	M	17	25.56	0.24	AML1/ETO+	-	IDA+Ara-C+VP16	YES	10	10	0.78652	10.0021	1.75085	5.58684	High	4.19081
19	BM	M2b	F	7	22.61	0.235	AML1/ETO+,KIT+	46,XX,t(8;21)(q22;q22)	IDA+Ara-C+VP16	YES	12	19.5667	0.908406	6.53568	1.84954	16.2646	High	3.59976
20	BM	M2b	M	3	28.78	0.275	AML1/ETO+	45,X.-Y,t（8；21）（q22;q22)	IDA+Ara-C+VP16	YES	10	16.0333	1.34551	9.7949	2.50533	9.35185	High	4.00559
												f

[truncated: 1 more sheets: S10 Primers]
